# Supplementary material
Source: Springer Nature journal article supplement (https://www.springermedizin.de/resource/supplementary/12963_2010_133_MOESM1_ESM.pdf/9572732)

### a. Males

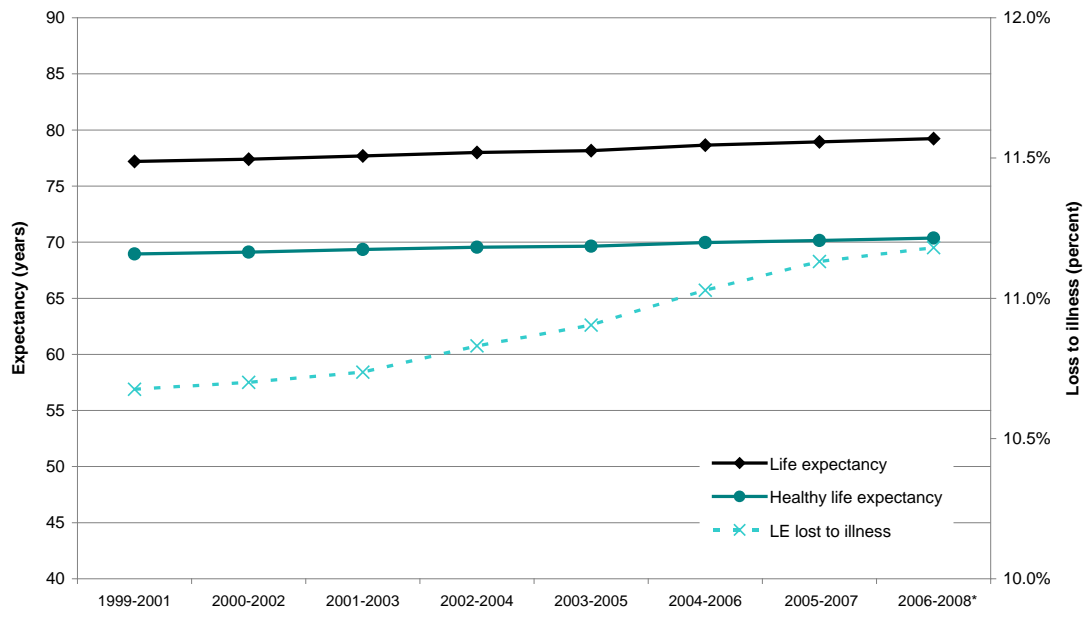

### b. Females

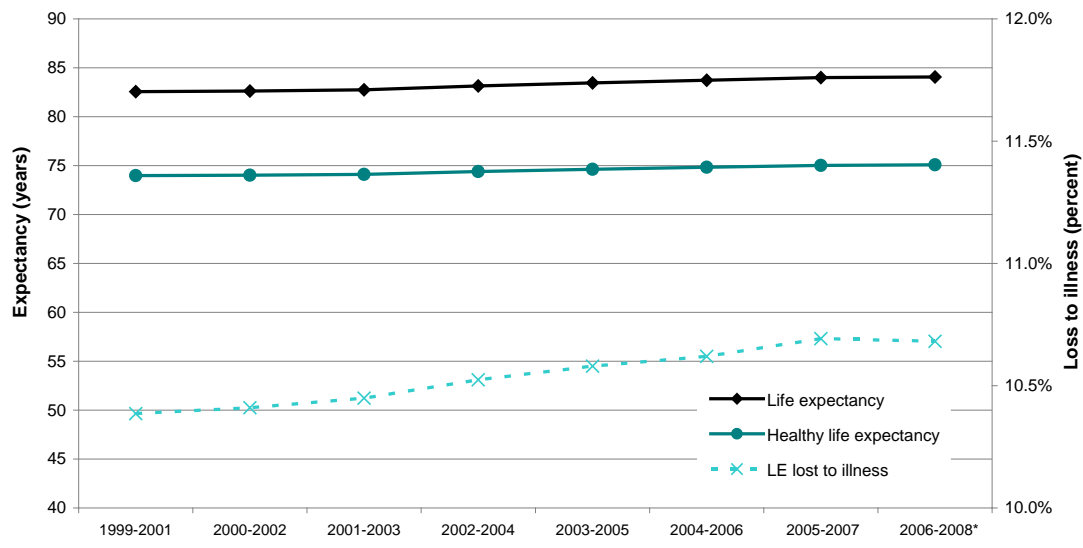

\*Provisional results based on two years observed and one year projected data

Supplement: MOESM1 [file 9572732]
